# Supplementary material for: Anticancer activity of biogenerated silver nanoparticles: an integrated proteomic investigation
Source: PubMed Central journal article supplement (PMC5839394; doi:10.18632/oncotarget.23859), 2017-12-23
Supplement: oncotarget-09-9685-s001.pdf [file oncotarget-09-9685-s001.pdf]

## **Anticancer activity of biogenerated silver nanoparticles: an integrated proteomic investigation**

### **SUPPLEMENTARY MATERIALS**

**Supplementary Table 1: List of differentially regulated proteins reporting spot identity, fold change, percentage of volume spots, ANOVA values, calculated by the software. See [Supplementary\\_Table\\_1](#)**

**Supplementary Table 2: List of the identified proteins reporting MS data informations. See [Supplementary\\_Table\\_2](#)**
